# Supplementary material for: Combined MYC and P53 Defects Emerge at Medulloblastoma Relapse and Define Rapidly Progressive, Therapeutically Targetable Disease
Source: PubMed Central journal article supplement (PMC4297293; doi:10.1016/j.ccell.2014.11.002), 2015-01-12
Supplement: mmc1.pdf [file mmc1.pdf]

## Supplemental Information

### **Combined MYC and P53 Defects Emerge at Medulloblastoma Relapse and Define Rapidly Progressive, Therapeutically Targetable Disease**

**Rebecca M. Hill, Sanne Kuijper, Janet C. Lindsey, Kevin Petrie, Ed C. Schwalbe, Karen Barker, Jessica K.R. Boulton, Daniel Williamson, Zai Ahmad, Albert Hallsworth, Sarra L. Ryan, Evon Poon, Simon P. Robinson, Ruth Ruddle, Florence I. Raynaud, Louise Howell, Colin Kwok, Abhijit Joshi, Sarah Leigh Nicholson, Stephen Crosier, David W. Ellison, Stephen B. Wharton, Keith Robson, Antony Michalski, Darren Hargrave, Thomas S. Jacques, Barry Pizer, Simon Bailey, Fredrik J. Swartling, William A. Weiss, Louis Chesler, and Steven C. Clifford**

## SUPPLEMENTAL DATA

| Table S1 (related to Table1). Molecular details of <i>CTNNB1</i> and <i>TP53</i> mutated medulloblastomas |               |                         |                           |                   |                      |
|-----------------------------------------------------------------------------------------------------------|---------------|-------------------------|---------------------------|-------------------|----------------------|
| Patient number                                                                                            | Mutated gene  | Protein                 | p53 database <sup>1</sup> | Acquired mutation | Molecular subgroup   |
| 13                                                                                                        | <i>CTNNB1</i> | Ser34Phe                | n/a                       | No                | MB <sub>WNT</sub>    |
| 14                                                                                                        | <i>CTNNB1</i> | Ser37deletion           | n/a                       | Unknown           | MB <sub>WNT</sub>    |
| 5                                                                                                         | <i>TP53</i>   | Gly245Val               | Yes                       | Yes               | MB <sub>SHH</sub>    |
| 8                                                                                                         | <i>TP53</i>   | Arg282Trp               | Yes                       | No                | MB <sub>SHH</sub>    |
| 10                                                                                                        | <i>TP53</i>   | Arg282Trp               | Yes                       | No                | MB <sub>SHH</sub>    |
| 12                                                                                                        | <i>TP53</i>   | Arg273His               | Yes                       | No                | MB <sub>SHH</sub>    |
| 13                                                                                                        | <i>TP53</i>   | Arg158Cys and Arg282Trp | Yes                       | No                | MB <sub>WNT</sub>    |
| 14                                                                                                        | <i>TP53</i>   | Arg273His               | Yes                       | Unknown           | MB <sub>WNT</sub>    |
| 22                                                                                                        | <i>TP53</i>   | Pro152Leu               | Yes                       | Yes               | MB <sub>Group4</sub> |
| 29                                                                                                        | <i>TP53</i>   | Arg175His               | Yes                       | Unknown           | Unknown              |

<sup>1</sup>(Soussi et al. 2006) Ser, Serine; Phe, phenylalanine; Arg, Arginine; Cys, Cysteine; Trp, Tryptophan; His, Histidine; Gly, Glycine; Val, Valine; Pro, Proline; Leu, Leucine. n/a, not applicable. *CTNNB1* encodes Beta-catenin.

| Table S2 (related to Table1). Subgroup distribution in the present paired study cohort of relapsed medulloblastomas compared to previously published data |                      |                             |         |
|-----------------------------------------------------------------------------------------------------------------------------------------------------------|----------------------|-----------------------------|---------|
| Independent published cohort of medulloblastomas sampled at relapse <sup>1</sup> (Ramaswamy et al., 2013)                                                 |                      |                             |         |
| Molecular subgroup                                                                                                                                        | Paired relapse study | Independent published study |         |
|                                                                                                                                                           | Relapse              | Relapse                     | p value |
| MB <sub>SHH</sub>                                                                                                                                         | 12/25 (48%)          | 21/51 (41%)                 | 0.6275  |
| MB <sub>WNT</sub>                                                                                                                                         | 2/25 (8%)            | 1/51 (2%)                   | 0.2504  |
| MB <sub>Group3</sub>                                                                                                                                      | 2/25 (8%)            | 9/51 (18%)                  | 0.3215  |
| MB <sub>Group4</sub>                                                                                                                                      | 9/25 (36%)           | 20/51 (39%)                 | 1       |

  

| Relapsing tumours in an unbiased trial-based cohort of medulloblastomas sampled at diagnosis <sup>2</sup> (Schwalbe et al., 2013) |                      |                                          |         |
|-----------------------------------------------------------------------------------------------------------------------------------|----------------------|------------------------------------------|---------|
| Molecular subgroup                                                                                                                | Paired relapse study | Independently published study            |         |
|                                                                                                                                   | Relapse              | Relapsing tumours (sampled at diagnosis) | p value |
| MB <sub>SHH</sub>                                                                                                                 | 5/18 (28%)           | 17/64 (27%)                              | 1       |
| MB <sub>WNT</sub>                                                                                                                 | 2/18 (11%)           | 1/64 (2%)                                | 0.1198  |
| MB <sub>Group3</sub>                                                                                                              | 2/18 (11%)           | 16/64 (25%)                              | 0.3349  |
| MB <sub>Group4</sub>                                                                                                              | 9/18 (50%)           | 30/64 (47%)                              | 1       |

<sup>1</sup>Based on all patients with available subgroup data.  
<sup>2</sup>Based on all patients receiving radiotherapy aged 3-16 years. p, Fisher's exact test.

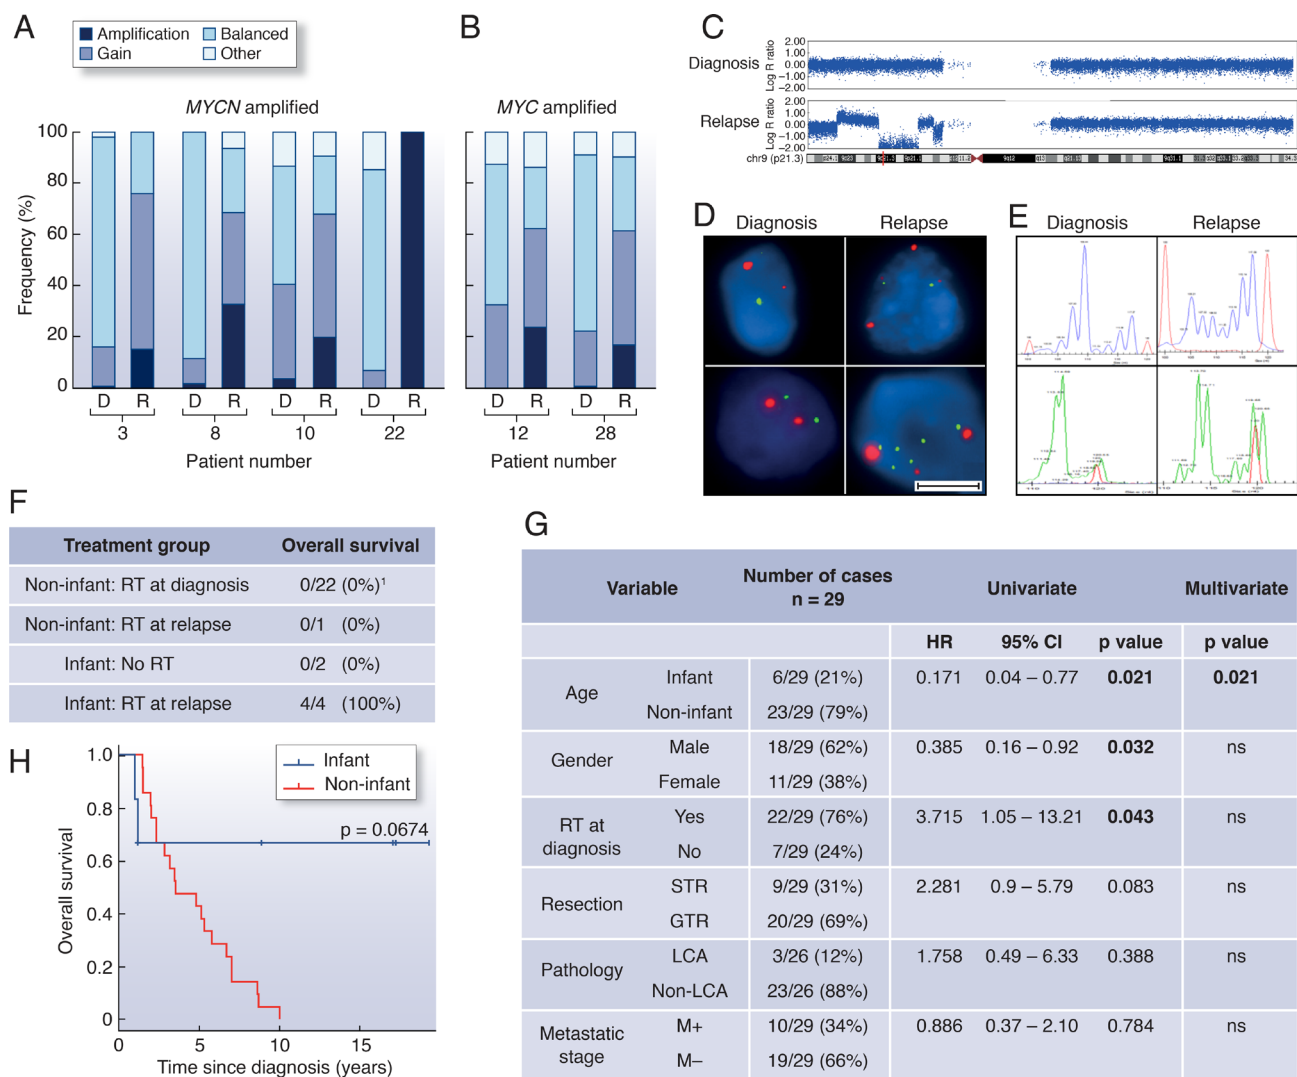

**Figure S1 (related to Figure 1). Analysis of enrichment and acquisition of molecular defects at relapse and patient survival following medulloblastoma recurrence**

(A) Frequency as determined by iFISH of intra-tumoral *MYCN* copy number defects at diagnosis (D) and relapse (R).

(B) Frequency as determined by iFISH of intra-tumoral *MYC* copy number defects at diagnosis (D) and relapse (R).

(C) *CDKN2A* (*p14<sup>ARF</sup>*) homozygous deletion at relapse (Illumina Omni-express SNP array; *CDKN2A* position, red).

(D) Evolution of chromosome 17 defects and polyploidy by iFISH. (top left) 17p loss (green versus centromeric control (red)), (bottom left) balanced 17q, (top right) maintenance of 17p loss with development of polyploidy, (bottom right) acquisition of polyploidy and 17q gain (overall i(17q)). Scale bar indicates 5  $\mu$ M.

(E) Acquisition of microsatellite instability at relapse (diagnosis; normal heterozygous profiles and relapse; multiple peaks demonstrating instability).

(F) Survival status of 29 relapsed medulloblastoma patients by treatment received. Infant, < 4.0 years at diagnosis; RT, radiotherapy. <sup>1</sup>Two patients died from treatment complications.

(G) Unadjusted Cox proportional hazard models assessing the prognostic significance (overall survival) of clinico-pathological variables at diagnosis in relapsing patients. STR, subtotal resection; GTR, gross total resection; LCA, large-cell/anaplastic; M+, M2+ disease; M-, M0/M1.

(H) Kaplan-Meier curve (whole cohort) showing survival of infant patients following recurrence (p, log-rank test, Bonferroni corrected).

**Table S3 (related to Figure 1). Incidence of clinical, pathological and molecular features in the present relapsed study cohort (at diagnosis and relapse) compared to large historic cohorts**

| Clinicopathological and molecular features |                                                        | Historic studies <sup>1</sup> | Paired relapse study |                |             |                   |
|--------------------------------------------|--------------------------------------------------------|-------------------------------|----------------------|----------------|-------------|-------------------|
|                                            |                                                        | Diagnosis                     | Diagnosis            | p value        | Relapse     | p value           |
| Gender                                     | Male                                                   | 585/952 (61%)                 | 18/29 (62%)          | 1              | 18/29 (62%) | 1                 |
|                                            | Female                                                 | 367/952 (39%)                 | 11/29 (38%)          |                | 11/29 (38%) |                   |
|                                            | Male:female ratio                                      | 1.6:1                         | 1.6:1                |                | 1.6:1       |                   |
| Age                                        | Age range in years                                     | 0.3–52                        | 0.1–33.7             | 0.6261*        |             |                   |
|                                            | Infants (<4 years)                                     | 167/943 (17%)                 | 6/29 (21%)           |                |             |                   |
|                                            | Children (4–16 years)                                  | 599/943 (64%)                 | 22/29 (76%)          |                |             |                   |
|                                            | Adults (>16 years)                                     | 177/943 (19%)                 | 1/29 (3%)            |                |             |                   |
| Pathology                                  | CLA                                                    | 938/1277 (74%)                | 16/26 (61%)          | 1*             | 14/24 (58%) | 0.1073*           |
|                                            | DN                                                     | 183/1277 (14%)                | 7/26 (27%)           |                | 4/24 (17%)  |                   |
|                                            | LCA                                                    | 156/1277 (12%)                | 3/26 (12%)           |                | 6/24 (25%)  |                   |
| Metastatic stage                           | M–                                                     | 608/834 (73%)                 | 9/22 (41%)           | <b>0.0026</b>  | 6/24 (25%)  | <b>&lt;0.0001</b> |
|                                            | M+                                                     | 226/834 (27%)                 | 13/22 (59%)          |                | 18/24 (75%) |                   |
| Resection                                  | GTR                                                    | 267/317 (84%)                 | 20/29 (69%)          | 0.0657         | n/a         |                   |
|                                            | STR                                                    | 50/317 (16%)                  | 9/29 (31%)           |                | n/a         |                   |
| Molecular subgroup                         | MB <sub>SHH</sub>                                      | 153/550 (28%)                 | 12/25 (48%)          | <b>0.0402*</b> | 12/25 (48%) | <b>0.0402*</b>    |
|                                            | MB <sub>WNT</sub>                                      | 60/550 (11%)                  | 2/25 (8%)            | 1              | 2/25 (8%)   | 1                 |
|                                            | MB <sub>Group3</sub>                                   | 149/550 (27%)                 | 2/25 (8%)            | <b>0.0355*</b> | 2/25 (8%)   | <b>0.0355*</b>    |
|                                            | MB <sub>Group4</sub>                                   | 188/550 (34%)                 | 9/25 (36%)           | 0.8324         | 9/25 (36%)  | 0.8324            |
| Molecular defects                          | <i>MYC/MYCN</i> amplification                          | 50/552 (9%)                   | 2/25 (8%)            | 1              | 9/29 (31%)  | <b>0.0012</b>     |
|                                            | <i>MYC</i> amplification                               | 17/552 (3%)                   | 1/25 (4%)            | 0.5549         | 4/29 (14%)  | <b>0.0166</b>     |
|                                            | <i>MYCN</i> amplification                              | 33/552 (6%)                   | 1/25 (4%)            | 1              | 5/29 (17%)  | <b>0.034</b>      |
|                                            | <i>TP53</i> mutations                                  | 21/310 (7%)                   | 4/26 (15%)           | 0.1157         | 8/29 (28%)  | <b>0.0013</b>     |
|                                            | Chromosome 17 defects                                  | 138/260 (53%)                 | 8/21 (38%)           | 0.2562         | 10/21 (48%) | 0.6562            |
| Combined molecular defects                 | <i>TP53</i> mutation and <i>MYC/MYCN</i> amplification | 8/310 (3%)                    | 0/26 (0%)            | 1              | 6/29 (21%)  | <b>0.0004</b>     |
|                                            | <i>TP53</i> mutation and <i>MYC</i> amplification      | 1/310 (<1%)                   | 0/26 (0%)            | 1              | 2/29 (7%)   | <b>0.0201</b>     |
|                                            | <i>TP53</i> mutation and <i>MYCN</i> amplification     | 7/310 (2%)                    | 0/26 (0%)            | 1              | 4/29 (14%)  | <b>0.0094</b>     |

<sup>1</sup>Historic studies: (Kool et al., 2012; Pfister et al., 2009; Ryan et al., 2012; McManamy et al., 2007; Lanngering et al., 2012; Pfaff et al., 2010). Pathology variant: CLA, classic; LCA, large-cell/anaplastic; DN, desmoplastic/nodular. Metastatic stage: M–, M0; M+, M1-4. Resection: GTR, gross total resection; STR sub-total resection. Data are shown as a proportion and percentage of all data available. \*Patients with each specific feature compared against all others. Features significantly enriched at diagnosis and relapse are in bold (p, Fisher's exact test). n/a, not applicable.

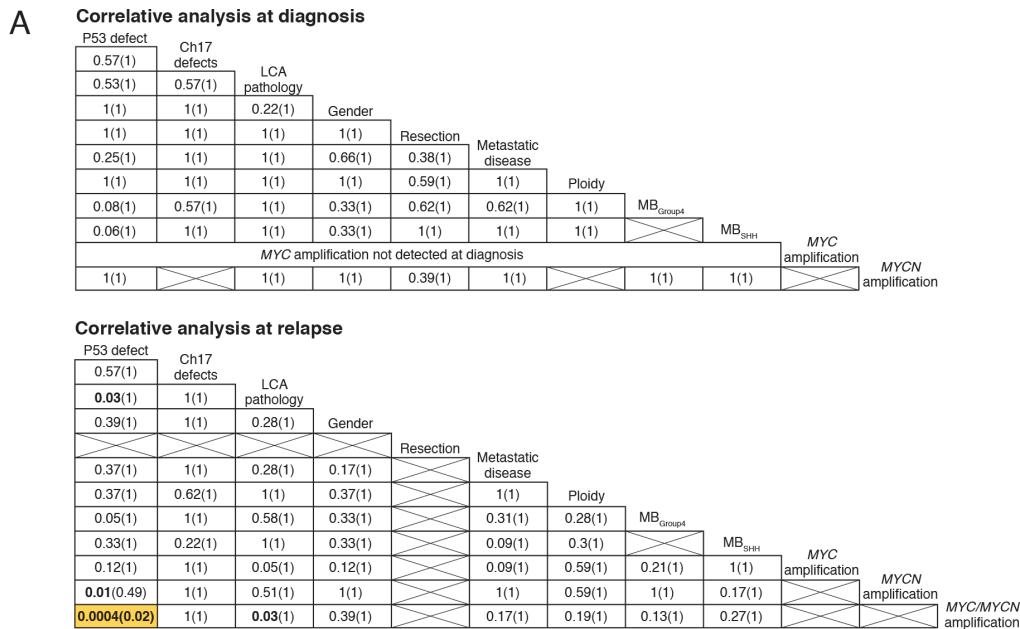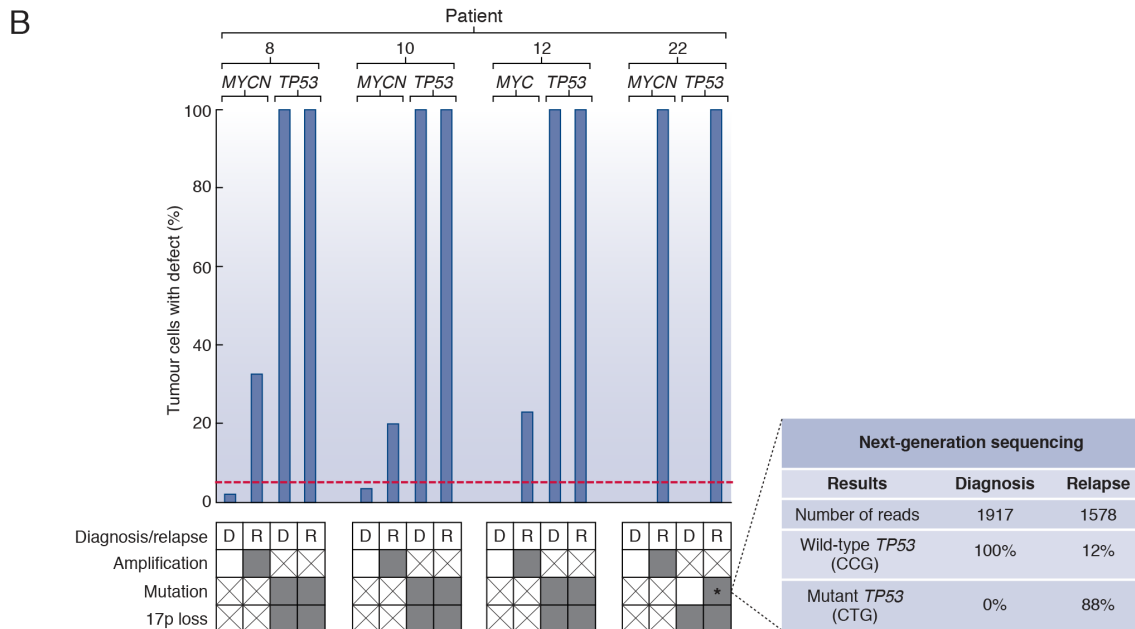

**Figure S2 (related to Figure 2). Analysis of combined P53 pathway defects and MYC/MYCN amplification at relapse**

(A) MYC/MYCN amplification and P53 pathway defects at relapse are significantly correlated. Correlative p values (p, Fisher's exact test) at diagnosis and relapse are shown for patients receiving standard upfront radiotherapy and chemotherapy before and after (in parentheses) adjustment for multiple testing (Bonferroni correction). Cross-hatched boxes, not relevant.

(B) Assessment of intra-tumoral molecular heterogeneity supports the development of combined MYC family gene amplification and TP53 mutation by both clonal enrichment and de novo acquisition. Estimated percentages of MYC/MYCN-amplified (by iFISH; >5% cells, dashed red line) and TP53 mutated (estimated peak heights, mutant versus wild-type) tumor cells at diagnosis (D) and relapse (R) in four patients with available material support clonal enrichment (e.g. MYCN amplification in patients 8 & 10) and de novo acquisition of combined defects at relapse (e.g. MYC amplification in patient 12; MYCN amplification and TP53 mutation in patient 22). Patient 22 showed no evidence of TP53 mutation at diagnosis, based on >1900 next-generation sequencing reads (\*expanded box). All TP53 mutated tumors also displayed chromosome 17p loss. (bottom grid) grey, present; white, absent; cross-hatched, not relevant.

**Table S4 (related to Figure 2). Combined *MYC/MYCN* amplification and P53 pathway defects predict a significantly shorter time to death following relapse**

| Variable                                                      |                      | Number of cases | Univariate |            |              | Multivariate |
|---------------------------------------------------------------|----------------------|-----------------|------------|------------|--------------|--------------|
|                                                               |                      |                 | HR         | 95% CI     | p value      | p value      |
| P53 pathway defect & <i>MYC/MYCN</i> amplification at relapse | Yes                  | 7/20 (35%)      | 8.185      | 1.93–34.19 | <b>0.004</b> | <b>0.004</b> |
|                                                               | No                   | 13/20 (65%)     |            |            |              |              |
| <i>MYC/MYCN</i> amplification at relapse                      | Yes                  | 7/20 (35%)      | 8.185      | 1.93–34.19 | <b>0.004</b> | ns           |
|                                                               | No                   | 13/20 (65%)     |            |            |              |              |
| P53 pathway defect at relapse                                 | Yes                  | 8/20 (40%)      | 3.692      | 1.26–10.78 | <b>0.017</b> | ns           |
|                                                               | No                   | 12/20 (60%)     |            |            |              |              |
| <i>MYCN</i> amplification at relapse                          | Yes                  | 4/20 (20%)      | 5.633      | 1.35–23.44 | <b>0.017</b> | ns           |
|                                                               | No                   | 16/20 (80%)     |            |            |              |              |
| Pathology at diagnosis                                        | LCA                  | 3/17 (18%)      | 6.304      | 1.22–32.45 | <b>0.028</b> | ns           |
|                                                               | Non-LCA              | 14/17 (82%)     |            |            |              |              |
| P53 pathway defect at diagnosis                               | Yes                  | 4/17 (24%)      | 2.919      | 0.86–9.91  | 0.086        | ns           |
|                                                               | No                   | 13/17 (76%)     |            |            |              |              |
| Ch17 defects at relapse                                       | Yes                  | 8/14 (57%)      | 3.149      | 0.78–12.71 | 0.107        | ns           |
|                                                               | No                   | 6/14 (43%)      |            |            |              |              |
| <i>MYC</i> amplification at relapse                           | Yes                  | 3/20 (15%)      | 2.905      | 0.74–11.39 | 0.126        | ns           |
|                                                               | No                   | 17/20 (85%)     |            |            |              |              |
| Subgroup                                                      | MB <sub>SHH</sub>    | 5/13 (38%)      | 2.272      | 0.67–7.67  | 0.186        | ns           |
|                                                               | MB <sub>Group4</sub> | 8/13 (62%)      |            |            |              |              |
| Ch17 defects at diagnosis                                     | Yes                  | 7/14 (50%)      | 2.207      | 0.68–7.15  | 0.187        | ns           |
|                                                               | No                   | 7/14 (50%)      |            |            |              |              |
| Pathology at relapse                                          | LCA                  | 5/17 (29%)      | 1.613      | 0.53–4.88  | 0.397        | ns           |
|                                                               | Non-LCA              | 12/17 (71%)     |            |            |              |              |
| Metastatic stage at diagnosis                                 | M+                   | 8/20 (40%)      | 1.45       | 0.57–3.68  | 0.439        | ns           |
|                                                               | M–                   | 12/20 (60%)     |            |            |              |              |
| Gender                                                        | Male                 | 12/20 (60%)     | 0.728      | 0.29–1.86  | 0.506        | ns           |
|                                                               | Female               | 8/20 (40%)      |            |            |              |              |
| Ploidy at relapse                                             | Yes                  | 8/17 (47%)      | 0.835      | 0.31–2.25  | 0.722        | ns           |
|                                                               | No                   | 9/17 (53%)      |            |            |              |              |
| Metastatic stage at relapse                                   | M+                   | 10/18 (56%)     | 0.857      | 0.33–2.26  | 0.754        | ns           |
|                                                               | M–                   | 8/18 (44%)      |            |            |              |              |
| Ploidy at diagnosis                                           | Yes                  | 6/15 (40%)      | 1.03       | 0.36–2.99  | 0.956        | ns           |
|                                                               | No                   | 9/15 (60%)      |            |            |              |              |
| Resection at diagnosis                                        | STR                  | 5/20 (25%)      | 0.994      | 0.32–3.07  | 0.992        | ns           |
|                                                               | GTR                  | 15/20 (75%)     |            |            |              |              |

Univariate and multivariate Cox proportional hazard models are shown assessing the relationship between time from relapse to death and clinical, pathological and molecular disease features, in patients receiving conventional upfront therapy. HR, hazard ratio; CI, confidence interval; LCA, large-cell/anaplastic; Ch17, chromosome 17; M+, M2+; M-, M0/M1; STR, subtotal resection; GTR, gross total resection; ns, not significant. *MYC/MYCN* amplification at diagnosis and microsatellite instability at relapse were not assessed (only one case observed).

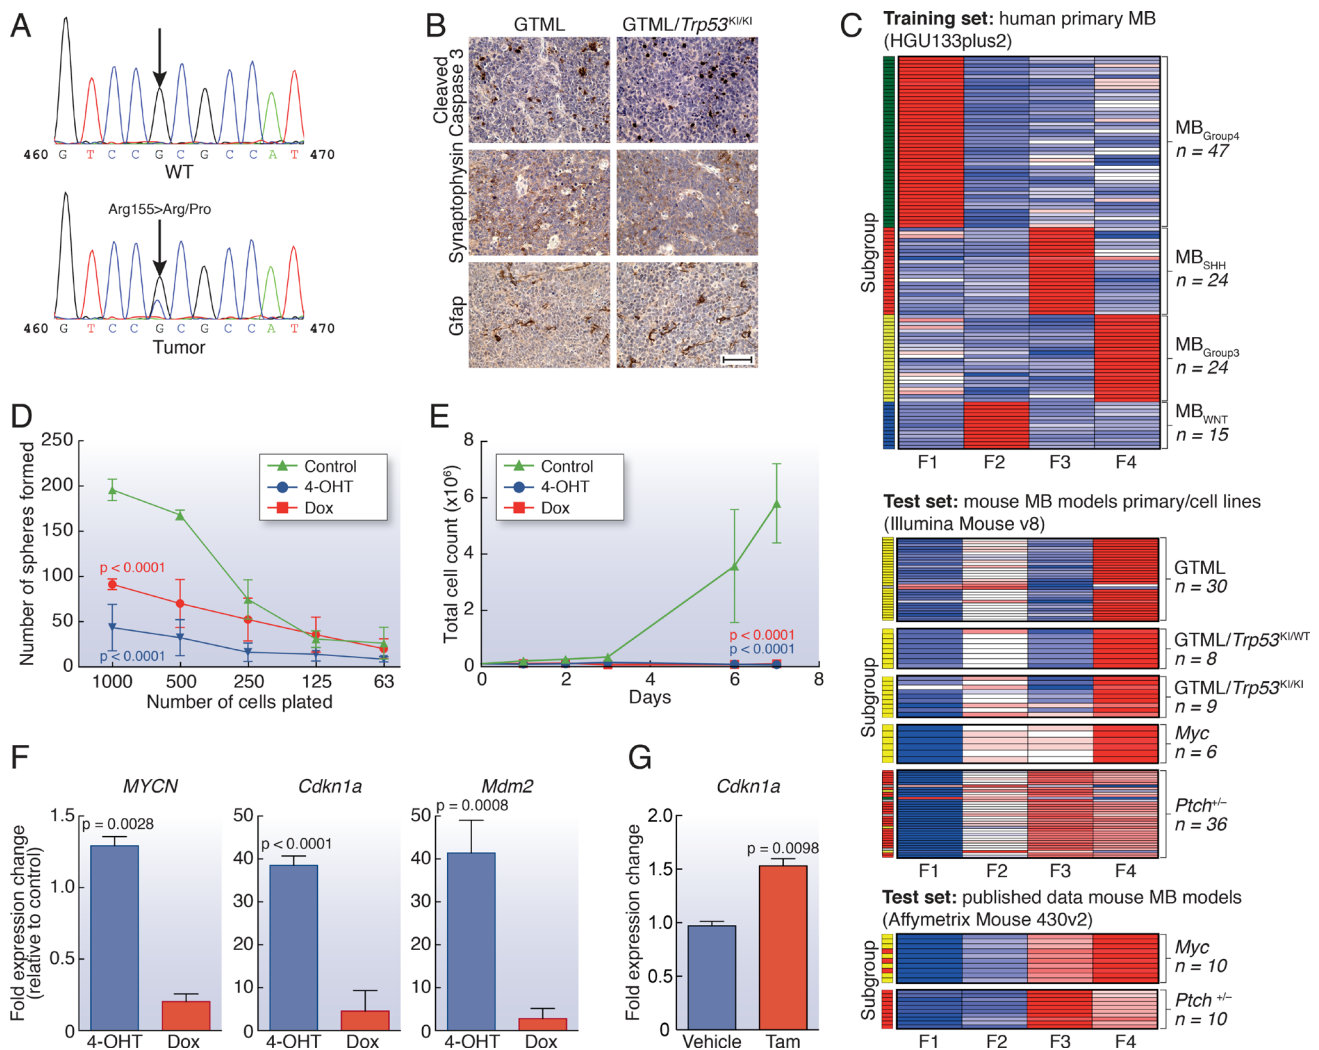

**Figure S3 (related to Figure 3). Characterization of *GTML/Trp53<sup>KI/KI</sup>* and *GTML* mice**

(A) Representative sequence indicates mutation in exon 5 (bottom panel), codon Arg155 leading to an amino acid change from arginine (CGC) to proline (CCC) in the tumor and not in the remaining brain tissue (top panel).

(B) H&E and immunohistochemical staining indicating apoptosis (Cleaved caspase 3), and levels of GFAP (a glial marker) and synaptophysin (a marker for neuroendocrine tumors) in *GTML/Trp53<sup>KI/KI</sup>* and *GTML* transgenic mice. Scale bar indicates 50  $\mu\text{m}$ .

(C) Heatmap showing results of a classification experiment whereby human MB expression profiles were converted to 4 metagenes that describe each of the four MB sub-types using Non-negative Matrix Factorization (NMF). A Support Vector Machine (SVM) was used to create a classifier trained on the human metagenes and tested on the NMF metagenes projected from human onto mouse model expression profiles. Blue-red heatmap shows expression of subgroup specific NMF metagenes. Colored side bar shows sub-group classification calls (red,  $\text{MB}_{\text{SHH}}$ ; blue,  $\text{MB}_{\text{WNT}}$ ; yellow,  $\text{MB}_{\text{Group3}}$ ; green,  $\text{MB}_{\text{Group4}}$ ; grey, low confidence i.e. no call).

(D) Limiting dilution assay showing numbers of *GTML/Trp53<sup>KI/KI</sup>* neurospheres formed after treatment (3 days) with 4-OHT or dox compared to untreated control. p, two-way Anova.

(E) Limiting dilution assay showing cell growth after treatment (3 days) with 4-OHT or dox compared to untreated control. p, two-way Anova.

(F) Real-time quantitative PCR (Taqman) of human *MYCN* mRNA expression levels after dox treatment, and *Cdkn1a* and *Mdm2* mRNA expression levels after 4-OHT treatment. p, unpaired t test.

(G) Quantitative analysis of *Cdkn1a* mRNA expression in situ in tumors from *GTML/Trp53<sup>KI/KI</sup>* mice treated with vehicle or tamoxifen (Tam) as indicated (see Figure 3G). Expression was quantified using RNAscope SpotStudio and data are presented as relative change in the average number of spots per  $\mu\text{m}^2$  of tumor cells analysed. p, unpaired t test.

Error bars represent mean  $\pm$  SD.

Table S5 (related to Figure 3). *Trp53* mutations in GTML mice

| Mouse ID#    | Tissue       | Sequence variant                               |                             | Somatic <i>TP53</i> mutation count in human cancer <sup>1</sup> |
|--------------|--------------|------------------------------------------------|-----------------------------|-----------------------------------------------------------------|
|              |              | cDNA                                           | Protein                     |                                                                 |
| <b>10519</b> | <b>Tumor</b> | <b>734G&gt;GA</b>                              | <b>Arg245Arg/His</b>        | <b>1544 (Arg248)<sup>2</sup></b>                                |
| 10519        | Brain        | None detected                                  | Wild type                   | n/a                                                             |
| <b>10087</b> | <b>Tumor</b> | <b>404C&gt;CT</b>                              | <b>Ala135Ala/Val</b>        | <b>110 (Ala138)</b>                                             |
| 10087        | Brain        | None detected                                  | Wild type                   | n/a                                                             |
| <b>26826</b> | <b>Tumor</b> | <b>464G&gt;GC</b>                              | <b>Arg155Arg/Pro</b>        | <b>264 (Arg158)</b>                                             |
| 26826        | Brain        | None detected                                  | Wild type                   | n/a                                                             |
| <b>10933</b> | <b>Tumor</b> | <b>464G&gt;GC</b>                              | <b>Arg155Arg/Pro</b>        | <b>264 (Arg158)</b>                                             |
| 10933        | Brain        | None detected                                  | Wild type                   | n/a                                                             |
| <b>14658</b> | <b>Tumor</b> | <b>701T&gt;C</b>                               | <b>Met234Thr</b>            | <b>214 (Met237)</b>                                             |
| 14658        | Brain        | None detected                                  | Wild type                   | n/a                                                             |
| <b>11185</b> | <b>Tumor</b> | <b>839G&gt;T, 841A&gt;C</b>                    | <b>Arg280Leu, Thr281Pro</b> | <b>103 (Arg283), 30 (Thr284)</b>                                |
| <b>14634</b> | <b>Tumor</b> | <b>382_405 het_delAATAAGCTATTCTGCCAGCTGGCG</b> | Wild type                   | n/a                                                             |
| <b>10545</b> | <b>Tumor</b> | <b>577C&gt;CG</b>                              | <b>Arg193Arg/Gly</b>        | <b>230 (Arg196)</b>                                             |
| <b>19780</b> | <b>Tumor</b> | <b>734G&gt;A</b>                               | <b>Arg245His</b>            | <b>1544 (Arg248)</b>                                            |
| <b>2737</b>  | <b>Tumor</b> | <b>526C&gt;T</b>                               | <b>His176Tyr</b>            | <b>341 (His179)</b>                                             |
| <b>9303</b>  | <b>Tumor</b> | None detected                                  | Wild type                   | n/a                                                             |
| 9303         | Tail         | None detected                                  | Wild type                   | n/a                                                             |
| <b>11153</b> | <b>Tumor</b> | None detected                                  | Wild type                   | n/a                                                             |

<sup>1</sup>(Soussi et al. 2006). <sup>2</sup>Equivalent human p53 amino acids are shown in parenthesis. Ala, Alanine; Arg, Arginine; Cys, Cysteine; Gly, Glycine; His, Histidine; Leu, Leucine; Met, Methionine; Pro, Proline; Thr, Threonine; Tyr, Tyrosine; Val, Valine. n/a, not applicable.



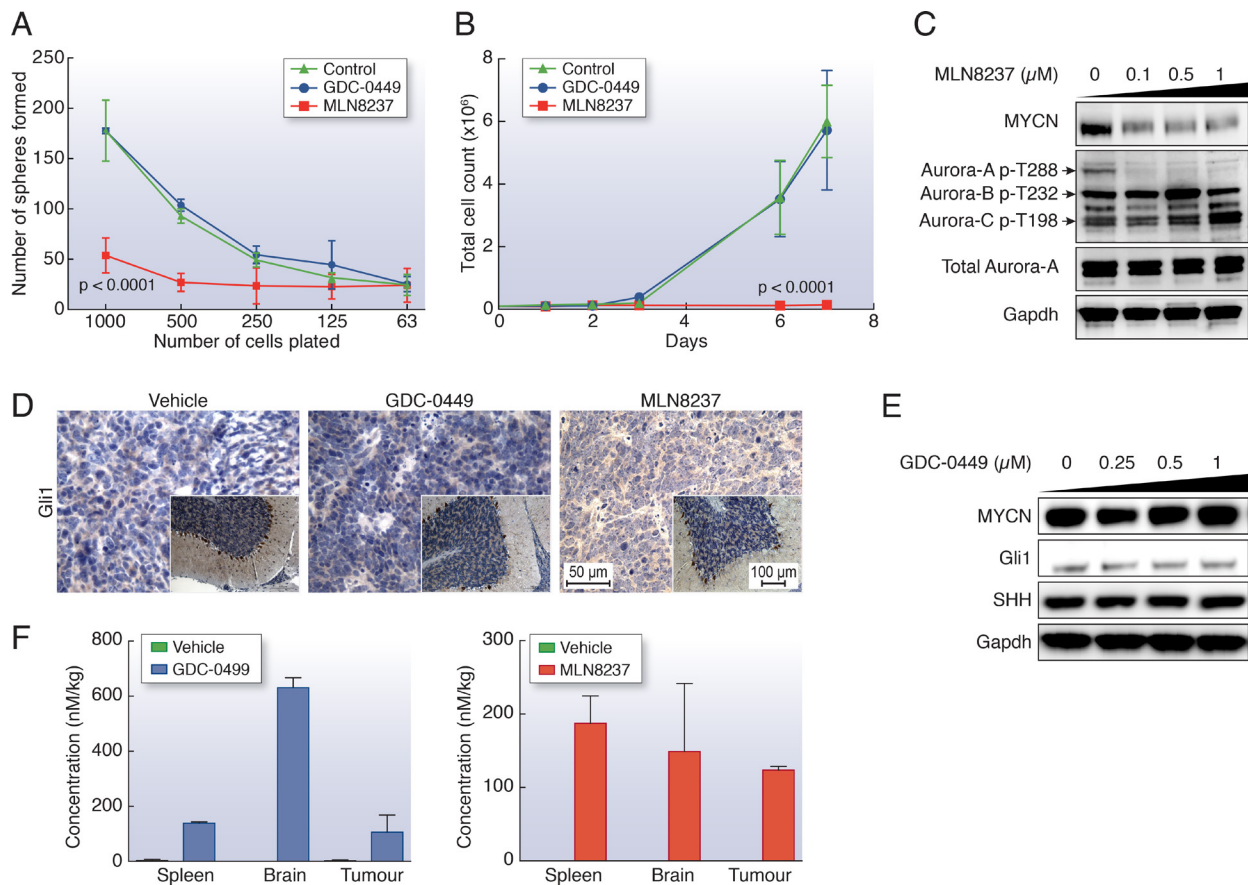

**Figure S4 (related to Figure 4). Treatment with the Aurora-A kinase inhibitor MLN8237 inhibits medulloblastoma cell growth *in vitro* increases survival in GTML/Trp53<sup>K1/K1</sup> mice**

(A) Limiting dilution assay showing numbers of GTML/Trp53<sup>K1/K1</sup> neurospheres formed after treatment (3 days) with GDC-0449 (blue) or MLN8237 (red) compared to untreated control (p, two-way Anova).

(B) Limiting dilution assay showing cell growth after treatment with GDC-0449 (blue) or MLN8237 (red) compared to untreated control (p, two-way Anova).

(C) Immunoblot analysis of MYCN, and phosphorylated Aurora-A (T288), Aurora-B (T232), Aurora-C (T198) and total Aurora-A protein levels in GTML/Trp53<sup>K1/K1</sup> neurospheres treated with MLN8237 at the indicated concentrations.

(D) Immunohistochemical analysis of Gli1 expression in MLN8237, GDC-0449 and vehicle treated tumor tissues. Scale bars represent 50  $\mu$ m or 100  $\mu$ m (inset) as indicated.

(E) Immunoblot analysis of MYCN, Gli1 and Sonic Hedgehog (SHH) protein levels in GTML/Trp53<sup>K1/K1</sup> neurospheres treated with GDC-0449 at the indicated concentrations.

(F) In vivo compound measurement of GDC-0449 and MLN8237 in spleen, brain and tumor tissue.

Error bars represent mean  $\pm$  SD.

## SUPPLEMENTAL EXPERIMENTAL PROCEDURES

### Analysis of Molecular Subgroup Status by DNA Methylation Profiling

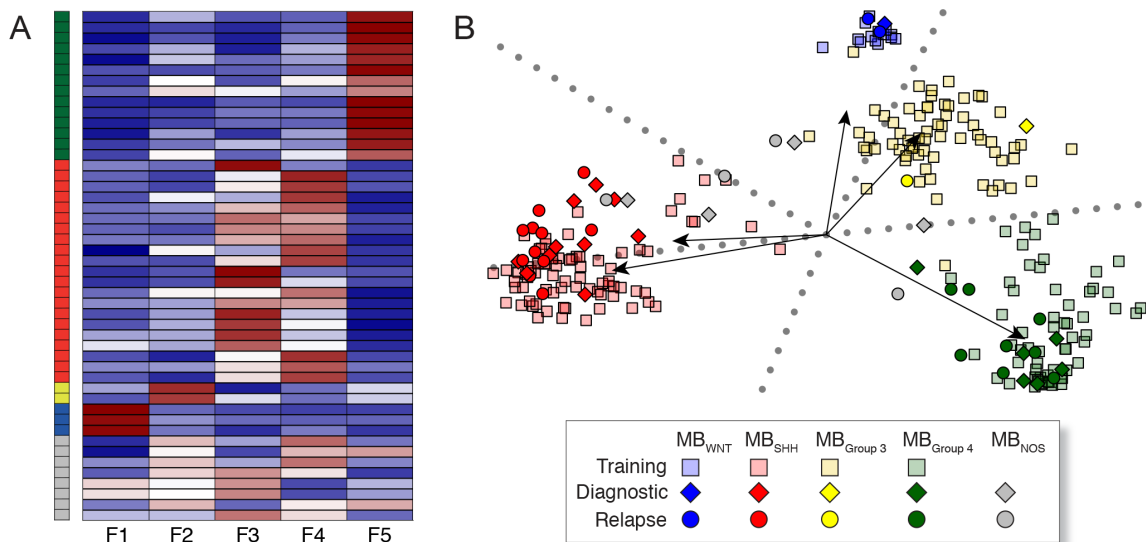

(A) Identification of subgroup membership using metagene patterns of the diagnostic and relapse samples within our study cohort. 5 metagenes (F1 to F5) were identified in the training cohort of 225 medulloblastomas using consensus NMF clustering; 2 metagenes (F3 and F4) identified the SHH subgroup, consistent with recent reports of heterogeneity within the SHH subgroup (Kool et al., 2014). Metagene projection (Tamayo et al., 2007) was employed to derive metagene values for the study cohort that were subsequently used to assign subgroup and assess classification confidence. Samples are shown in rows; samples confidently assigned to a subgroup are labelled by their assignment (red, MB<sub>SHH</sub>; blue, MB<sub>WNT</sub>; yellow, MB<sub>Group3</sub>; green, MB<sub>Group4</sub>). Samples within our study cohort that were unable to be confidently assigned (confidence score < 0.7) are labelled grey (MB<sub>NOS</sub>). High, intermediate and low metagene values are shown red, white and blue, respectively.

(B) Comparison of metagene patterns for diagnostic and relapse samples within our study cohort, with metagene patterns from the training cohort. Bi-plot of principal component analysis of combined training, diagnostic and relapsing cohorts. Arrows show projections of five metagenes along first and second principal components. Individual cases are plotted by their principal component scores. Training cohort cases are shown as squares, diagnostic cohort cases as diamonds and relapsing cohort cases as circles. Additionally, cases are labelled by their assigned subgroup (red, MB<sub>SHH</sub>; blue, MB<sub>WNT</sub>; yellow, MB<sub>Group3</sub>; green, MB<sub>Group4</sub>). Cases with an unclear subgroup (confidence score < 0.7) are labelled grey (MB<sub>NOS</sub>) and were not included in our subgroup analysis. Finally, training cohort cases are shown with transparency, to emphasise the members of our study cohort.

### Analysis of *TP53* Status in Clinical Samples

*TP53* status was assessed by direct polymerase chain reaction (PCR) based DNA sequence analysis of exons 4-9 using the following FAST PCR conditions: 95°C for 40s; 35 cycles of 94°C for 0s, then 64°C for 15s; 72°C for 45s (see below for primer sequences). Cases positive for P53 nuclear staining on immunohistochemistry (IHC) with no apparent mutation had an extended screen of exons 2-11 (see below for primer sequences). One tumor pair (patient 22, Figure S2B) that showed acquisition of a *TP53* mutation in exon 5 was assessed by next-generation sequencing using primers for exon 5 as previously described (Grossmann et al., 2011). Primer validation was performed according to manufacturer's instructions (Fluidigm) and PCR products checked using a 2100 BioAnalyzer (Agilent Technologies). Barcoded PCR products were pooled and run in a single sequencing experiment on a Roche 454 FLX sequencer (454 Life Sciences).

### Primers for *TP53* PCR reaction

| Location      | Forward primer 5'–3'   | Reverse primer 5'–3'    |
|---------------|------------------------|-------------------------|
| Exon 2        | CCAGGGTTGGAAGCGTCTC    | GACAAGAGCAGAAAAGTCAGTCC |
| Exon 3/4      | CATGGGACTGACTTTTCTGCTC | CTTCATCTGGACCTGGGTCT    |
| Exon 4 (part) | GGACGATATTGAACAATGGTT  | ATGGAAGCCAGCCCCTCAG     |
| Exon 4        | GGCTGAGGACCTGGTCCTCTGA | GCCAGGCATTGAAGTCTCATGG  |
| Exon 5        | ATCTGTTCACTTGTGCCCTG   | CAACCAGCCCTGTCGTCTCTC   |
| Exon 6        | GCCTCTGATTCCTCACTGAT   | GGAGGGCCACTGACAACCA     |
| Exon 7        | AAGGCGCACTGGCCTCATCTT  | CAGGGGTCAGAGGCAAGCAGA   |
| Exon 8        | GAGCCTGGTTTTTTAAATGG   | TTTGGCTGGGGAGAGGAGCT    |
| Exon 9        | AGCGAGGTAAGCAAGCAGG    | GCCCCAATTGCAGGTAAAACAG  |
| Exon 10       | CTTCTCCCCCTCCTCTGTTGC  | GAAGGCAGGATGAGAATGGA    |
| Exon 11       | GGCACAGACCCTCTCACTCAT  | TGCTTCTGACGCACACCTATT   |

### Microsatellite Instability and Polyploidy in Clinical Samples

Microsatellite instability was assessed by a panel of markers on different chromosomes; d9s942, d9s1748 d5s346, d2s123, *MYCL*, d18s69, s10s197, *TP53*, d17s2196, d17s936, d17s969, d17s974, d17s786 and d17s1866. Tumors were classed as showing microsatellite instability if > 40% of markers analyzed were unstable compared to the diagnostic sample (Boland et al., 1998; Jung et al., 2004; Langdon et al., 2006). Polyploidy, was defined as a modal score > 2 at ≥ 2 centromeric loci examined by iFISH (chromosomes 2, 8 and 17).

### *Trp53* Mutational Analysis

Genomic DNA was extracted from cell lines, tumors and where available, normal brain tissue using QIAamp DNA Mini kit (Qiagen). PCR amplification of exons 5-9 was performed using primers detailed below. Products were sequenced with the original PCR primers using the BigDye Terminator Cycle Sequencing Kit and an ABI 3730 Genetic Analyzer (Applied Biosystems). Sequences were analyzed using Mutation Surveyor software (SoftGenetics).

### Primers for *Trp53* PCR reaction

| Location | Forward primer 5'–3' | Reverse primer 5'–3' |
|----------|----------------------|----------------------|
| Exon 5/6 | GATCGTTACTCGGCTTGTC  | AAGACGCACAAACCAAAACA |
| Exon 7   | CTATAGCCAGCCATTCCCCG | AGGCAGAAGCTGGGGAAG   |
| Exon 8/9 | TACACACAGTCAGGATGGGG | ATGCGAGAGACAGAGGCAAT |

### Real-time PCR

Total RNA was isolated from cells or tumor tissue using the miRNAeasy minikit (Qiagen) and cDNA prepared using Superscript II Reverse Transcriptase (Life Technologies). Quantitative PCR (QT-PCR) was performed in triplicate using Taqman Gene Expression mix (Life Technologies) and gene-specific primers for *Cdkn1a* (Mm04205640), *Mdm2* (Mm01233136), *MYCN* (Hs00232074) and *Actb* (Mm00607939) (Life Technologies). Relative expression was calculated according to the  $\Delta\Delta C_t$  relative quantification method against the average expression of control cells treated with ethanol or vehicle treated tumors.

### In Situ Proximity Ligation Assay

Duolink in situ proximity ligation assay (PLA; Olink Bioscience) was performed on GTML/*Trp53*<sup>K1/K1</sup> neurospheres. Cells were fixed in 4% paraformaldehyde for 20 min, permeabilized with 0.5% Triton X-100, and blocked with 1% BSA for 30 min at room temperature followed by incubation with paired primary antibodies, MYCN (OP-13, Merck-Millipore) with Aurora-A (Genetex), overnight at 4°C. PLA detection was performed as recommended by the manufacturer. Images were taken and analyzed using the Zeiss LSM700 confocal microscope and analyzed using DuoLink image analysis software.

## Quantitative In Situ RNA Analysis

Dual color RNA *in situ* hybridization was performed using the RNAscope 2-plex Chromogenic Reagent Kit (Advanced Cell Diagnostics, ACD) according to the manufacturer's instructions. Paired double-Z oligonucleotide probes were designed against *Cdkn1a* using custom software as previously described (Wang et al., 2012). *Cdkn1a*-specific RNA target Z probe pairs (20) targeted bps 19 through 1240 of the *Cdkn1a* cDNA sequence (NM\_007669.4). Probe sets specific for mouse *Ubc* (ubiquitin C), *Polr2a* (DNA-directed RNA polymerase II subunit RPB1) and *Ppib* (Peptidylprolyl Isomerase B, Cyclophilin B) and *dapB* (dihydrodipicolinate reductase) gene from *B. subtilis* were also used. FFPE tissue blocks were sectioned at 4  $\mu\text{m}$ . Slides were baked for 1 hr at 60°C prior to use. After de-paraffinization and dehydration, the tissues were air dried and treated with peroxidase blocker before boiling at 100-104 °C in a pre-treatment solution for 15 min. Protease was then applied for 30 min at 40 °C. Target probes for each two-gene combination were premixed and hybridized together for 2 hr at 40 °C, followed by a series of signal amplification and washing steps. All hybridizations at 40 °C were performed in a HybEZ Hybridization System (ACD). Following the RNAscope assay, samples were counterstained for 2 minutes with 50% Gill's Hematoxylin diluted in dH<sub>2</sub>O. Hybridization signals were detected by sequential chromogenic reactions using red and green chromogens, and RNA staining signal was identified as red and green punctate dots. Each sample was quality controlled for RNA integrity with a probe specific to the *Ppib* housekeeping gene only samples with an average of >4 dots per cell were included for analysis. Negative control background staining was evaluated using a probe specific to the bacterial *dapB* gene; only samples with an average of <1 dot per 10 cells were included for analysis. *Cdkn1a* expression was quantitated using RNAscope SpotStudio (Wang et al., 2013). Outline regions of interest (ROI) were classified into individual dots and clustered dots within the ROI. Hematoxylin-stained nuclei and cell boundaries were also detected. RNAscope *Cdkn1a* mRNA images were batch analyzed after selecting appropriate ROIs manually. For each whole slide image, three ROIs were selected to represent the entire tumor section. The number of cells analyzed ranged from 4,000 to 43,000.

## Pharmacokinetic analysis of MLN8237 and GDC-0449

Calibration and quality control solutions were prepared in dimethyl sulfoxide (DMSO). MLN8237 and GDC-0449 calibration standards used for spiking were prepared to give final matrix concentrations of 2-10000 nM. Quality Control (QC) standards were also prepared to give a final concentration of 25, 250, 750 and 2500 nM. A stock solution of Olomoucine (Sigma-Aldrich) internal standard (IS) was prepared in DMSO at a concentration of 1 mM and further diluted in methanol to give a working IS solution of 250 nM for quenching. Plasma and tissue samples were homogenized in either 3 or 5 ml/g phosphate buffered. 100  $\mu\text{l}$  aliquots of untreated mouse plasma or tissue homogenates were spiked with 10  $\mu\text{l}$  of the appropriate calibration or QC standard solutions. 100  $\mu\text{l}$  aliquots of the unknown samples were spiked with 10  $\mu\text{l}$  DMSO. Where necessary, plasma and tissue samples were diluted with untreated (blank) matrix. Spiked protein calibration standards, QCs and unknown samples were precipitated with 300  $\mu\text{L}$  methanol containing 250 nM IS. Blank samples were prepared by spiking 100  $\mu\text{l}$  untreated plasma/tissue with 10  $\mu\text{l}$  DMSO and protein precipitated with 300  $\mu\text{l}$  methanol. After centrifugation, supernatants were analyzed by liquid chromatography with tandem mass spectrometry detection (LC-MS/MS) using a Xevo TQ-S mass spectrometer coupled with an Acquity ultra-performance liquid chromatography UPLC H-class system (Waters). Chromatography was carried out using a Phenomenex C18 X-B column (2.6  $\mu\text{m}$ , 50 mm x 2.1 mm ID) with a gradient mobile phase consisting of 0.1 % formic acid and methanol. 2ml of sample was injected on to the column using a flow rate of 0.6 ml/min with a 5 minute run time. Both analytes and IS were ionized using electrospray interface in positive ion mode. Detection was via tandem mass spectrometry (MS/MS) in multiple reaction monitoring (MRM) mode. The transitions m/z 519.12-139.04, 421.11-110.87 and m/z 299.19-177.29 were monitored for MLN8237, GDC-0449 and IS respectively. Data acquisition was performed using Targetlynx. The assay was linear over the range 2-10,000 nM.

## Expression Microarray Analysis

Affymetrix HGU133plus2 expression profiles of primary tumors from 110 individuals with a diagnosis of medulloblastoma were taken from previously published studies (Fattet et al., 2009; Kool et al., 2008) (GSE12992 and GSE10327, respectively). Raw data were normalized and processed using gcRMA (Bioconductor/R). Processed data were converted to four metagenes representing the four sub-groups using non-negative matrix factorization (NMF) and these metagenes projected onto the mouse tumor/cell line expression profiles using an adaptation of a previously described procedure (Tamayo et al., 2007) (scripts available upon request). Mouse expression profiles were generated using Illumina Mouse v8 arrays according to manufacturer's instructions. Raw data were processed using the beadarray package (Bioconductor/R). Expression profiles from primary murine medulloblastoma samples and cell lines included a total of 47 from GTML-based mouse models, 6 from a *Myc/Trp53*-deficient mouse model (Kawauchi et al., 2012) (gifted by Martine Roussel, St. Jude Children's Research Hospital) and 36 from *Ptch*<sup>+/-</sup> mice (Lastowska et al., 2013) (GSE43994). Also included were published *Ptch*<sup>+/-</sup> and *Myc/Trp53*-deficient mouse gene expression profiles (Kawauchi et al., 2012) (GSE34126 and GSE24628). Subgroup calls for mouse tumors were made using a support vector machine algorithm (SVM) trained on the four human subgroup metagenes and tested on the projected mouse metagenes.

## SUPPLEMENTAL REFERENCES

Boland, C. R., Thibodeau, S. N., Hamilton, S. R., Sidransky, D., Eshleman, J. R., Burt, R. W., Meltzer, S. J., Rodriguez-Bigas, M. A., Fodde, R., Ranzani, G. N., and Srivastava, S. (1998). A National Cancer Institute Workshop on Microsatellite Instability for cancer detection and familial predisposition: development of international criteria for the determination of microsatellite instability in colorectal cancer. *Cancer research* 58, 5248-5257.

Fattet, S., Haberler, C., Legoix, P., Varlet, P., Lellouch-Tubiana, A., Lair, S., Manie, E., Raquin, M. A., Bours, D., Carpentier, S., et al. (2009). Beta-catenin status in paediatric medulloblastomas: correlation of immunohistochemical expression with mutational status, genetic profiles, and clinical characteristics. *The Journal of pathology* 218, 86-94.

Grossmann, V., Kohlmann, A., Zenger, M., Schindela, S., Eder, C., Weissmann, S., Schnittger, S., Kern, W., Muller, M. C., Hochhaus, A., et al. (2011). A deep-sequencing study of chronic myeloid leukemia patients in blast crisis (BC-CML) detects mutations in 76.9% of cases. *Leukemia* 25, 557-560.

Jung, H. L., Wang, K. C., Kim, S. K., Sung, K. W., Koo, H. H., Shin, H. Y., Ahn, H. S., Shin, H. J., and Cho, B. K. (2004). Loss of heterozygosity analysis of chromosome 17p13.1-13.3 and its correlation with clinical outcome in medulloblastomas. *J Neurooncol* 67, 41-46.

Kool, M., Jones, D. T., Jager, N., Northcott, P. A., Pugh, T. J., Hovestadt, V., Piro, R. M., Esparza, L. A., Markant, S. L., Remke, M., et al. (2014). Genome Sequencing of SHH Medulloblastoma Predicts Genotype-Related Response to Smoothed Inhibition. *Cancer cell* 25, 393-405.

Kool, M., Koster, J., Bunt, J., Hasselt, N. E., Lakeman, A., van Sluis, P., Troost, D., Meeteren, N. S., Caron, H. N., Cloos, J., et al. (2008). Integrated genomics identifies five medulloblastoma subtypes with distinct genetic profiles, pathway signatures and clinicopathological features. *PLoS one* 3, e3088.

Lastowska, M., Al-Afghani, H., Al-Balool, H. H., Sheth, H., Mercer, E., Coxhead, J. M., Redfern, C. P., Peters, H., Burt, A. D., Santibanez-Koref, M., et al. (2013). Identification of a neuronal transcription factor network involved in medulloblastoma development. *Acta Neuropathol Commun* 1, 35.

Soussi, T., Asselain, B., Hamroun, D., Kato, S., Ishioka, C., Claustres, M., and Beroud, C. (2006). Meta-analysis of the p53 mutation database for mutant p53 biological activity reveals a methodologic bias in mutation detection. *Clinical cancer research : an official journal of the American Association for Cancer Research* 12, 62-69.

Wang, F., Flanagan, J., Su, N., Wang, L. C., Bui, S., Nielson, A., Wu, X., Vo, H. T., Ma, X. J., and Luo, Y. (2012). RNAscope: a novel in situ RNA analysis platform for formalin-fixed, paraffin-embedded tissues. *The Journal of molecular diagnostics : JMD* 14, 22-29.

Wang, Z., Portier, B. P., Gruver, A. M., Bui, S., Wang, H., Su, N., Vo, H. T., Ma, X. J., Luo, Y., Budd, G. T., and Tubbs, R. R. (2013). Automated quantitative RNA in situ hybridization for resolution of equivocal and heterogeneous ERBB2 (HER2) status in invasive breast carcinoma. *The Journal of molecular diagnostics : JMD* 15, 210-219.
